# Supplementary material for: Winter climate change mediates the sensitivity of vegetation leaf-out to spring warming in high latitudes in China
Source: PubMed Central journal article supplement (PMC11646735; doi:10.3389/fpls.2024.1476576), 2024-12-02
Supplement: DataSheet1.pdf [file DataSheet1.pdf]

*Supplementary Material*

Supplementary Figures

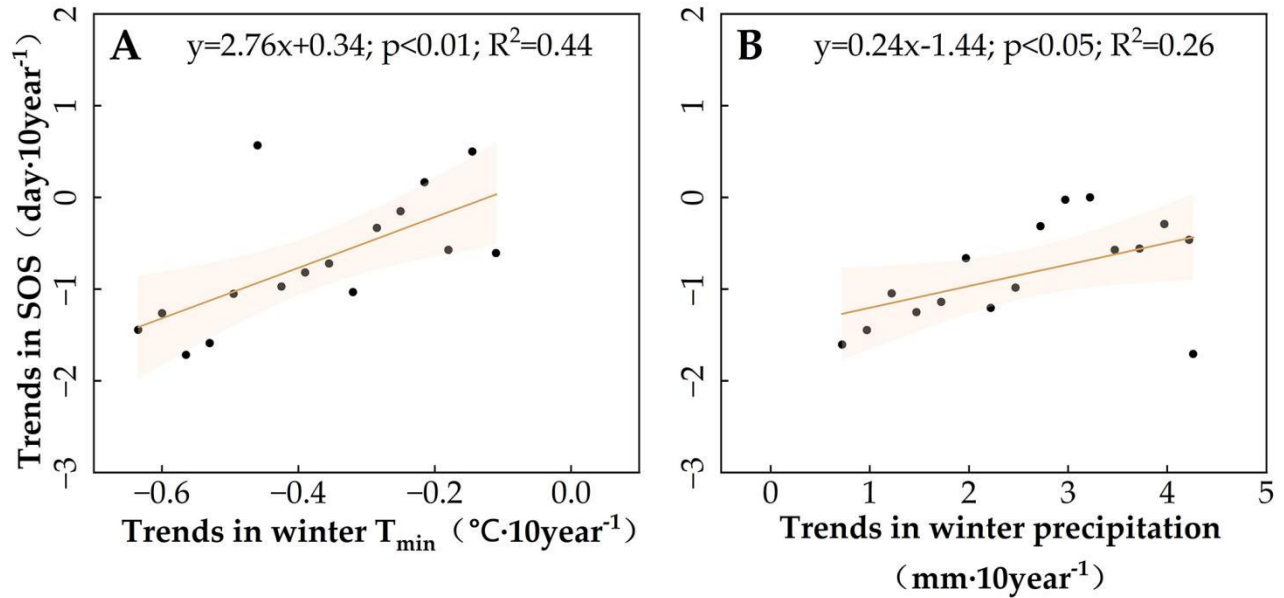

**Figure S1.** Moderating role of winter climatic indicators in Region 1 (DNF) on the spring temperature sensitivity of SOS; (A) the effect of winter T<sub>min</sub> trends on SOS trends; (B) the effect of winter precipitation trends on SOS trends. The lines indicate the linear fit for the winter temperature trends, and the shading represents the 95% confidence band.

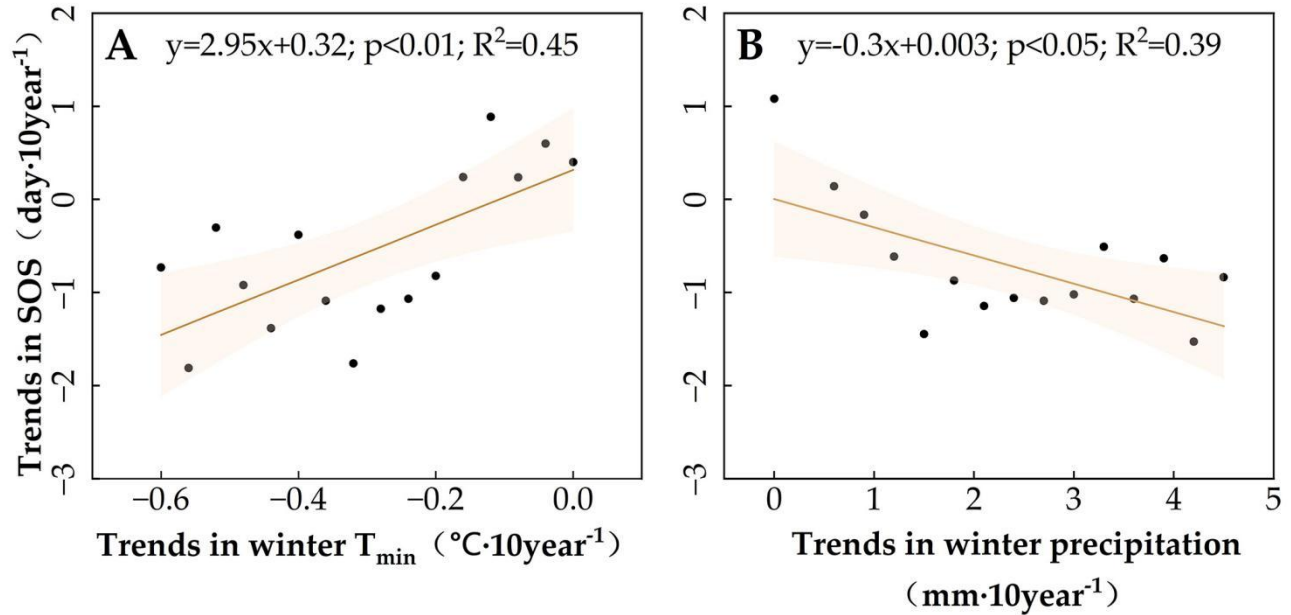

**Figure S2.** Moderating role of winter climatic indicators in Region 2 (grassland) on the spring temperature sensitivity of SOS; (A) the effect of winter  $T_{\min}$  trends on SOS trends; (B) the effect of winter precipitation trends on SOS trends. The lines indicate the linear fit for the winter temperature trends, and the shading represents the 95% confidence band.

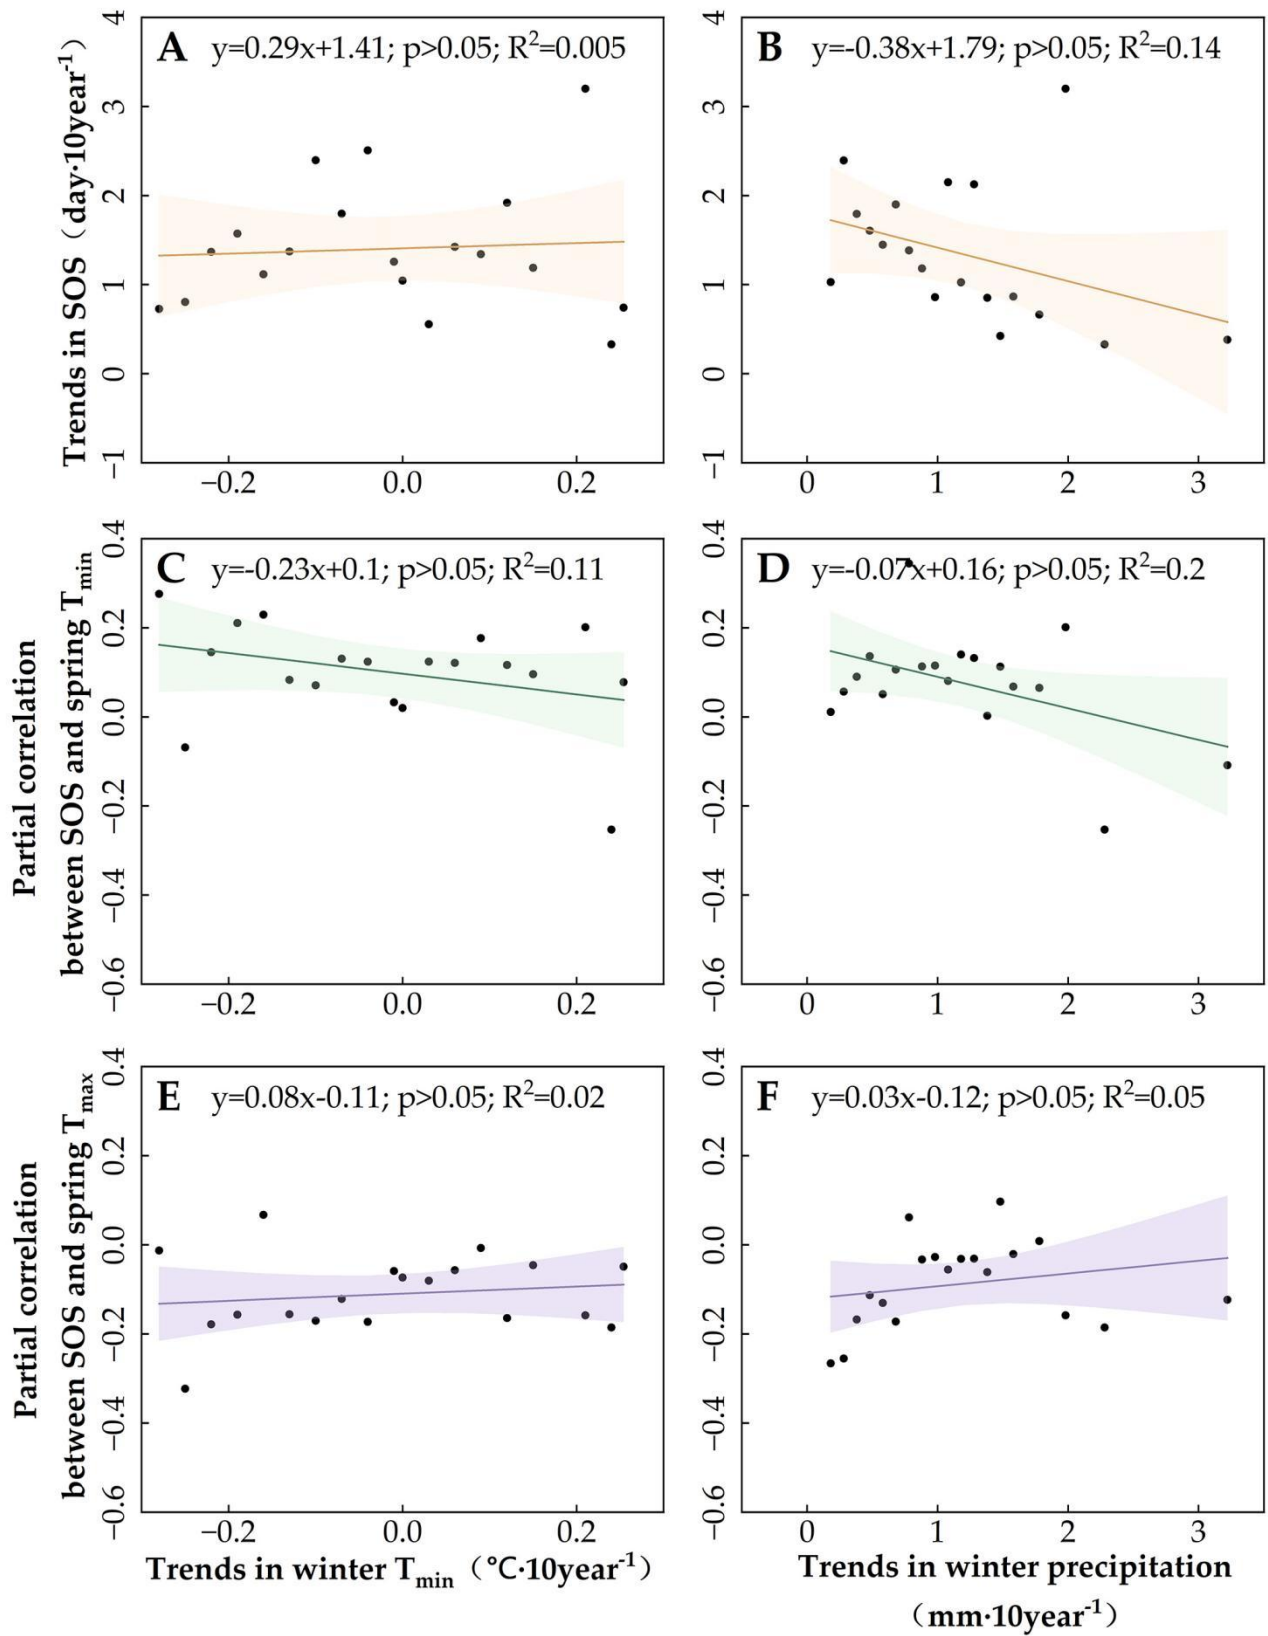

**Figure S3.** Moderating role of winter climatic indicators in Region 3 (grassland) on the spring temperature sensitivity of SOS; (A) the effect of winter  $T_{\min}$  trends on SOS trends; (B) the effect of

winter precipitation trends on SOS trends; (C) the effect of winter  $T_{\min}$  trends on the partial correlation between SOS and  $T_{\min}$ ; (D) the effect of winter precipitation trends on the partial correlation between SOS and  $T_{\min}$ ; (E) the effect of winter  $T_{\min}$  trends on the partial correlation between SOS and  $T_{\max}$ ; (F) the effect of winter precipitation trends on the partial correlation between SOS and  $T_{\max}$ . The lines indicate the linear fit for the winter temperature trends, and the shading represents the 95% confidence band.

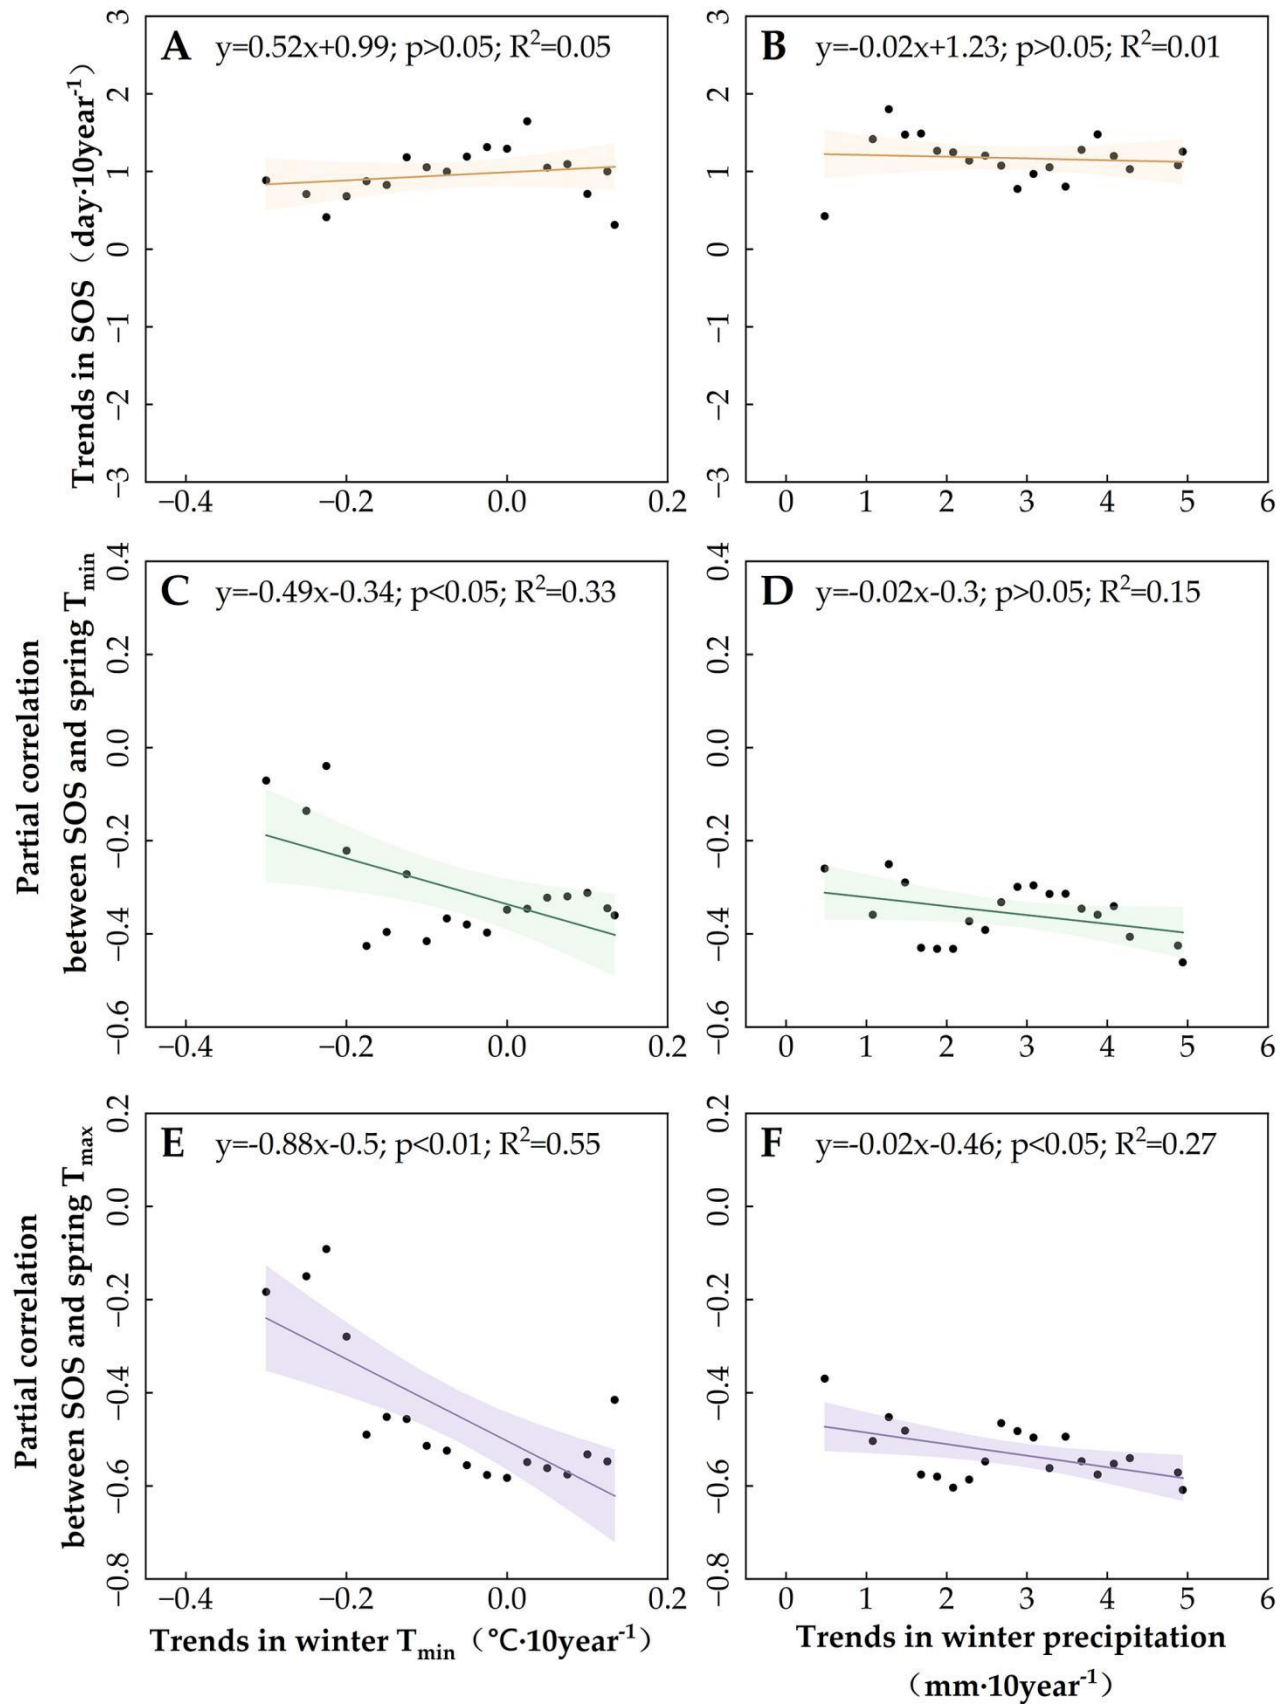

**Figure S4.** Moderating role of winter climatic indicators in Region 4 (DBF) on the spring

temperature sensitivity of SOS; (A) the effect of winter  $T_{\min}$  trends on SOS trends; (B) the effect of winter precipitation trends on SOS trends; (C) the effect of winter  $T_{\min}$  trends on the partial correlation between SOS and  $T_{\min}$ ; (D) the effect of winter precipitation trends on the partial correlation between SOS and  $T_{\min}$ ; (E) the effect of winter  $T_{\min}$  trends on the partial correlation between SOS and  $T_{\max}$ ; (F) the effect of winter precipitation trends on the partial correlation between SOS and  $T_{\max}$ . The lines indicate the linear fit for the winter temperature trends, and the shading represents the 95% confidence band.

## Supplementary Tables

**Table S1.** Proportion of pixels with negative partial correlation between SOS and climate factors

|                  |        | <b>DNF</b>      | <b>DBF</b>      | <b>Grassland</b> |
|------------------|--------|-----------------|-----------------|------------------|
| T <sub>min</sub> | Winter | 45.12% (0.18%)  | 62.13% (0.3%)   | 52.97% (2.91%)   |
|                  | Spring | 99.42% (52.99%) | 99.13% (65.24%) | 63.39% (6.55%)   |
| T <sub>max</sub> | Winter | 81.39% (0.49%)  | 91.83% (5.08%)  | 59.39% (4.36%)   |
|                  | Spring | 100% (85.26%)   | 99.85% (86.9%)  | 73.01% (15.8%)   |
| Precipitation    | Winter | 96.27% (26.74%) | 80.9% (18.55%)  | 88.28% (27.68%)  |
|                  | Spring | 85.66% (3.6%)   | 69.13% (39.78%) | 84.28% (35.84%)  |

Note: Proportion of significant pixels in parentheses ( $p < 0.05$ ).

**Table S2.** Proportion of pixels with positive partial correlation between SOS and climate factors

|               |        | <b>DNF</b>     | <b>DBF</b>     | <b>Grassland</b> |
|---------------|--------|----------------|----------------|------------------|
| $T_{\min}$    | Winter | 54.88% (0.13%) | 37.87% (0.17%) | 47.03% (2.87%)   |
|               | Spring | 0.58% (0)      | 0.87% (0)      | 36.61% (2.3%)    |
| $T_{\max}$    | Winter | 18.61% (0)     | 8.17% (0)      | 40.61% (1.01%)   |
|               | Spring | 0              | 0.15% (0)      | 26.99% (0.4%)    |
| Precipitation | Winter | 3.73% (0.22%)  | 19.1% (1.35%)  | 11.72% (0.48%)   |
|               | Spring | 14.34% (0)     | 30.87% (0.02%) | 15.72% (0.24%)   |

Note: Proportion of significant pixels in parentheses ( $p < 0.05$ ).
